# Supplementary material for: Phytochemical Profiling and Antioxidant Activities of the Most Favored Ready-to-Use Thai Curries, Pad-Ka-Proa (Spicy Basil Leaves) and Massaman
Source: MDPI journal article supplement (doi:10.3390/foods13040582), 2024-02-14
Supplement: s1 [file s1]

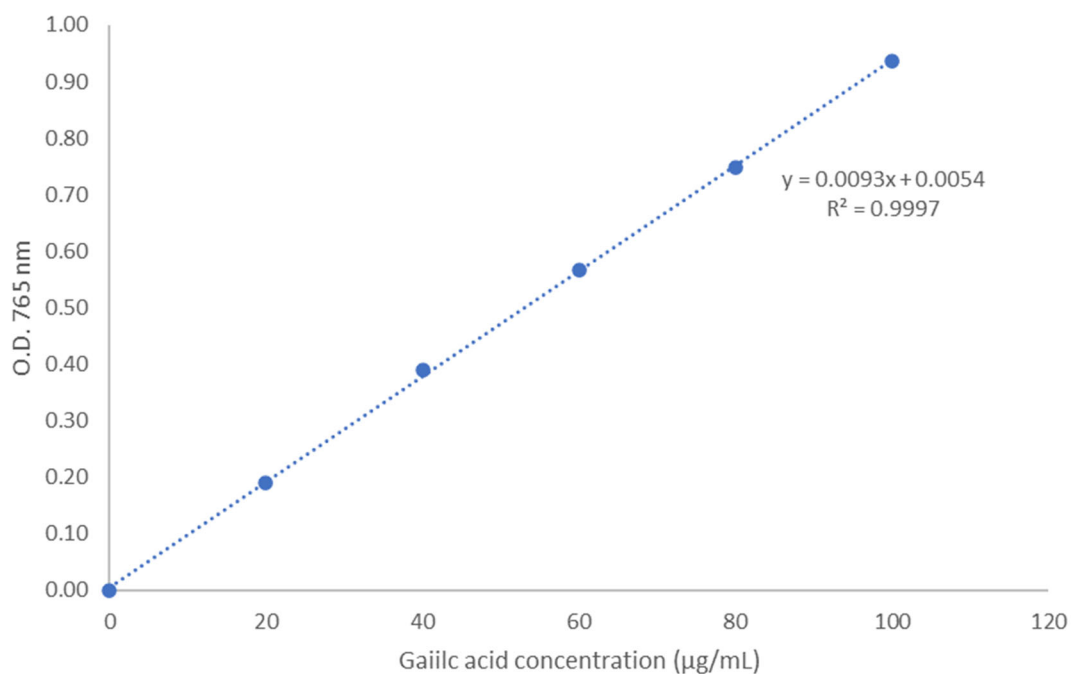

**Figure S1** Standard curve of total phenolic content (TPC) with gallic acid agent used as a standard.

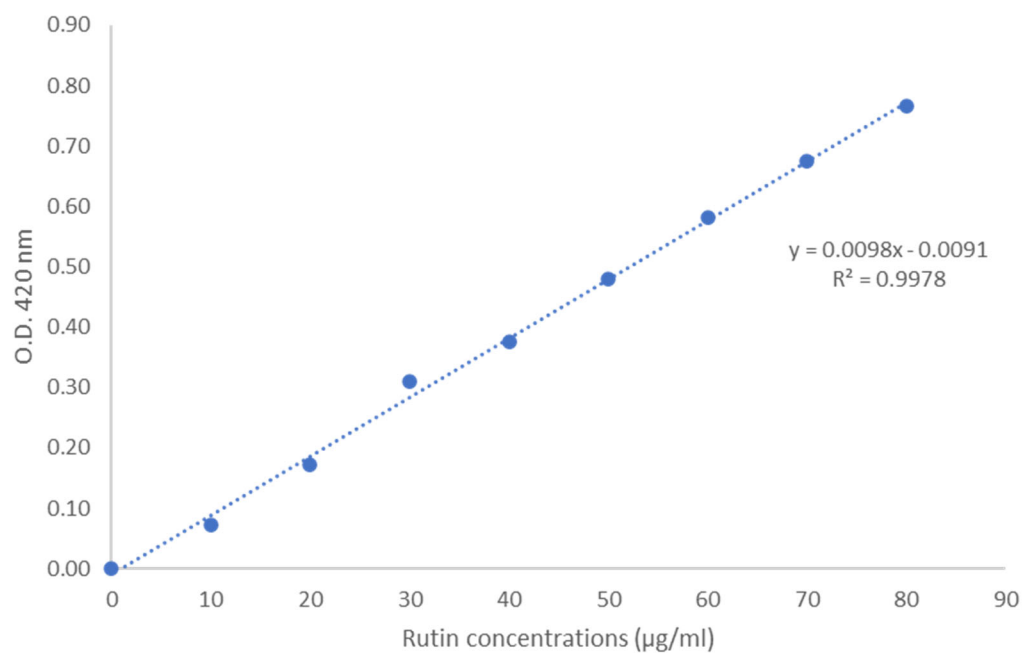

**Figure S2** Standard curve of total flavonoid content (TFC) with rutin agent used as a standard.

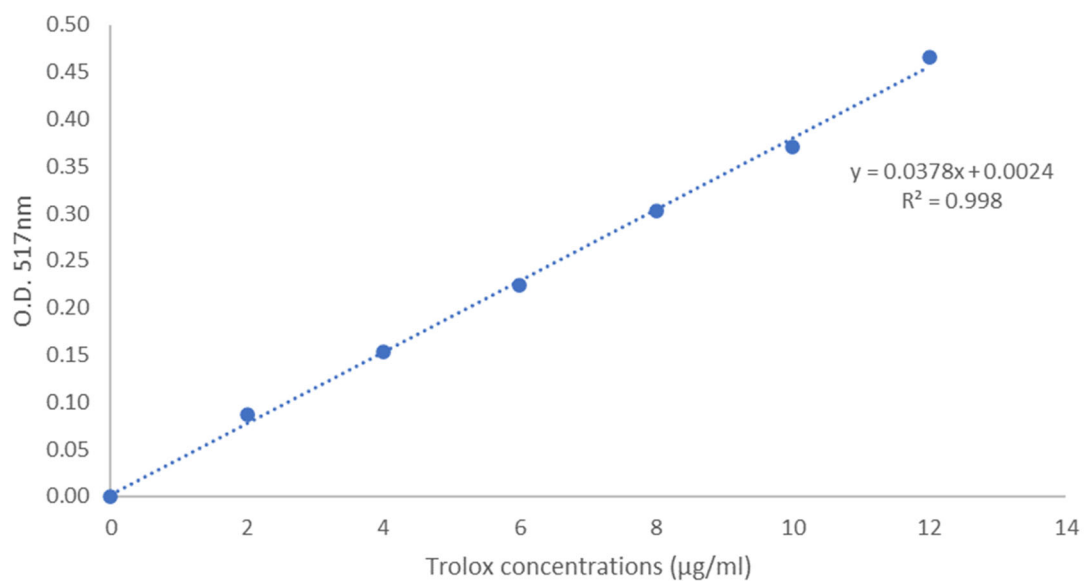

**Figure S3** Standard curve of DPPH assay with Trolox agent used as a standard.

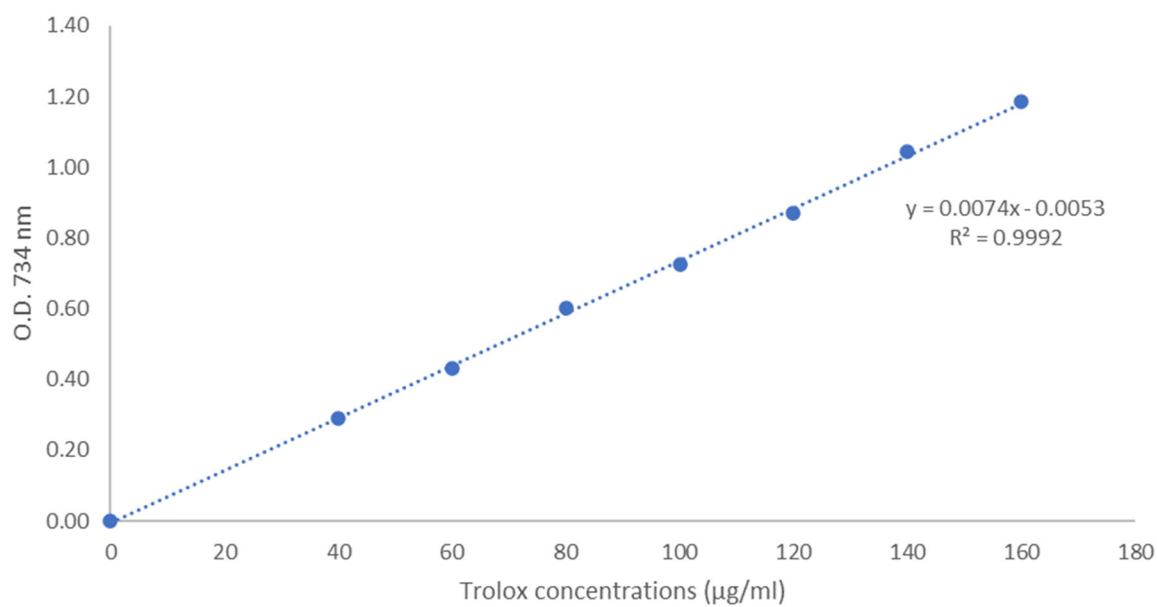

**Figure S4** Standard curve of ABTS assay with Trolox agent used as a standard.

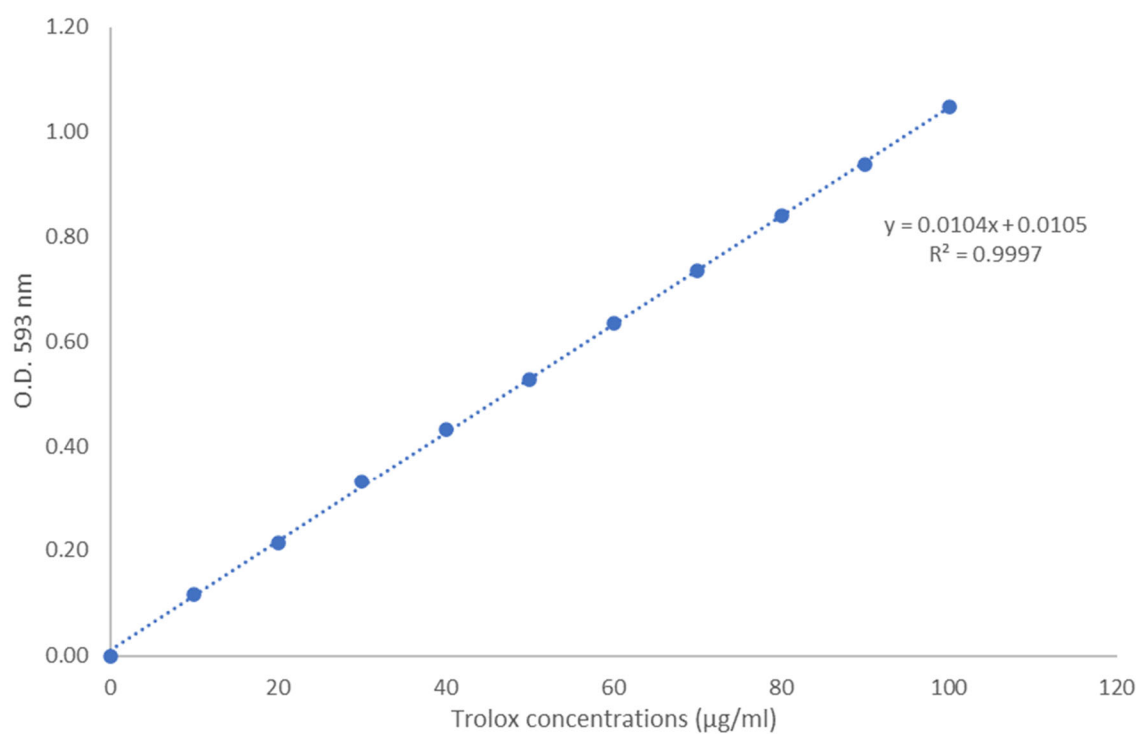

**Figure S5** Standard curve of FRAP assay with Trolox agent used as a standard.

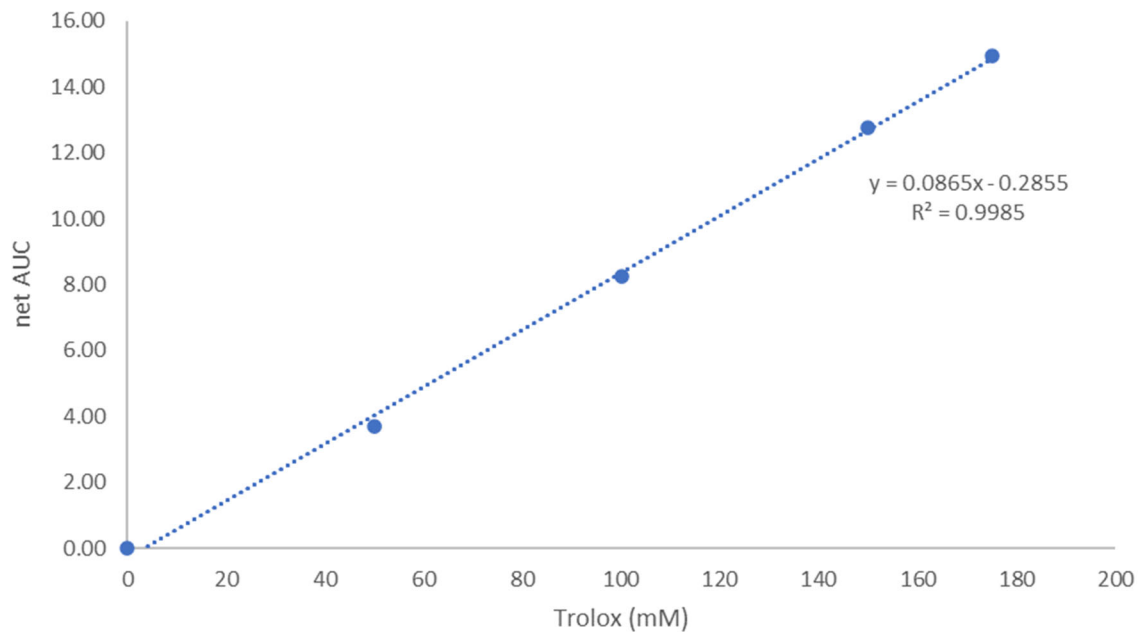

**Figure S6** Standard curve of ORAC assay with Trolox agent used as a standard.

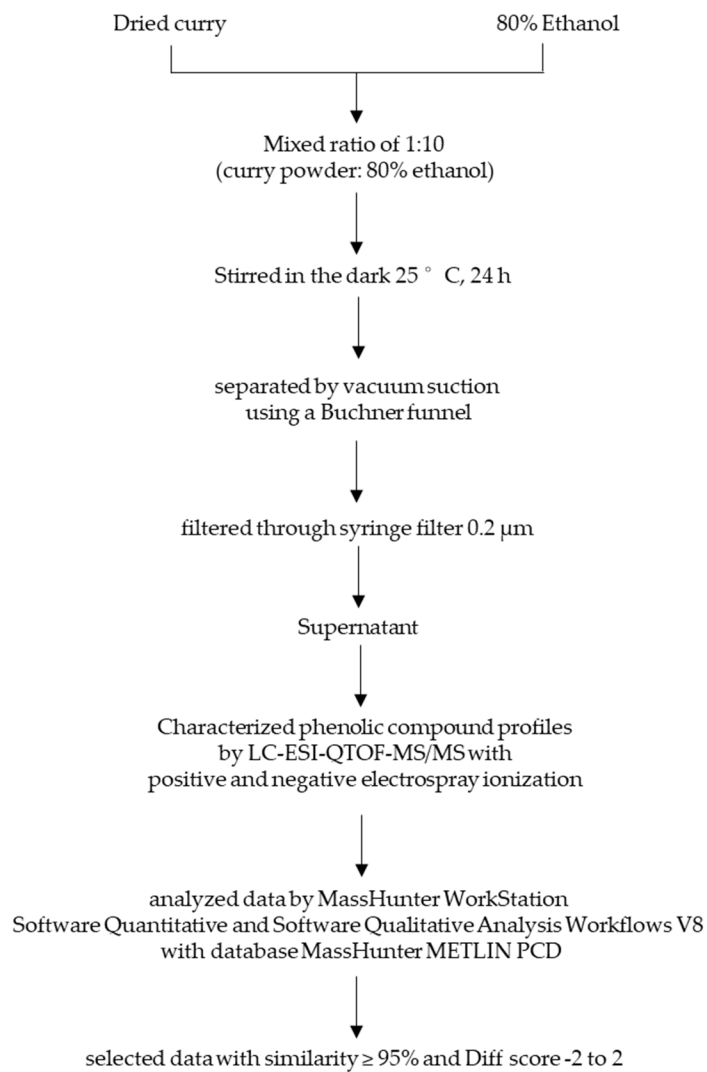

**Figure S7** Diagram of characterization of phenolic profiles by LC-ESI-QTOF-MS/MS.

**Table S1** Correlation coefficients of total phenolic content, total flavonoid content, and antioxidant activities.

| Variables | TPC     | TFC     | DPPH    | ABTS    | FRAP    |
|-----------|---------|---------|---------|---------|---------|
| TFC       | 0.974** |         |         |         |         |
| DPPH      | 0.996** | 0.971** |         |         |         |
| ABTS      | 0.994** | 0.967** | 0.994** |         |         |
| FRAP      | 0.994** | 0.966** | 0.993** | 0.995** |         |
| ORAC      | 0.974** | 0.898*  | 0.981** | 0.981** | 0.985** |

\*\* Correlation is significant at  $p < 0.01$  and \* Correlation is significant at  $p < 0.05$
